# Supplementary material for: Productive Characteristics and Fruit Quality Traits of Cherry Tomato Hybrids as Modulated by Grafting on Different Solanum spp. Rootstocks under Ralstonia solanacearum Infested Greenhouse Soil
Source: MDPI journal article supplement (doi:10.3390/agronomy11071311), 2021-06-28
Supplement: s1 [file s1]

Archive with 1 entries (1 files):
- agronomy-1227125-supplementary.pdf
