# Supplementary figures and images for: Productive Characteristics and Fruit Quality Traits of Cherry Tomato Hybrids as Modulated by Grafting on Different Solanum spp. Rootstocks under Ralstonia solanacearum Infested Greenhouse Soil
Source: MDPI journal article supplement (doi:10.3390/agronomy11071311), 2021-06-28

## Supplementary Material

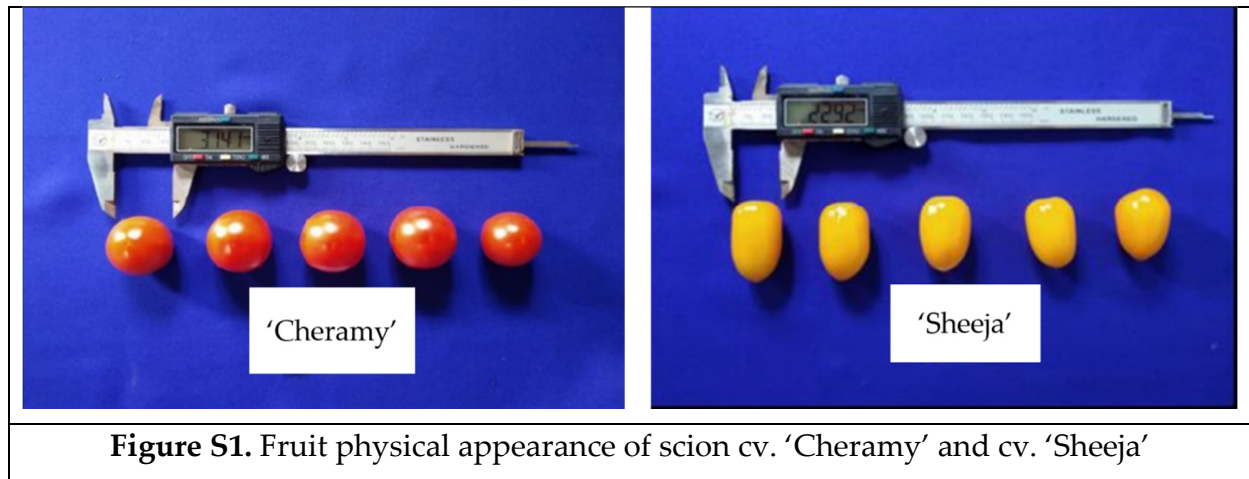

Supplement: s1 [file s1 › agronomy-1227125-supplementary.pdf]
